# Supplementary material for: Ventral and Dorsal Pathways Relate Differently to Visual Awareness of Body Postures under Continuous Flash Suppression
Source: eNeuro. 2018 Feb 13;5(1):ENEURO.0285-17.2017. doi: 10.1523/ENEURO.0285-17.2017 (PMC5810040; doi:10.1523/ENEURO.0285-17.2017)
Supplement: Extended Data Figure 4-1 — The average percent signal change data for the four main conditions and the catch trials (judging number of visible dots, followed by a button press) for individual participants. Download Figure 4-1, XLSX file. [file sup_enu-eN-NWR-0285-17-s01.xlsx]

## Sheet: CFS_ROI_V1data_7subj_betas_pub
	Bilateral ROIs of individual areas:																															Combined ventral ROI:					Combined dorsal ROI:
Participants	V1_upinvis	V1_upvis	V1_invinvis	V1_invvis	V1_catch	FBA_upinvis	FBA_upvis	FBA_invinvis	FBA_invvis	FBA_catch	EBA_upinvis	EBA_upvis	EBA_invinvis	EBA_invvis	EBA_catch	pIPS_upinvis	pIPS_upvis	pIPS_invinvis	pIPS_invvis	pIPS_catch	mIPS_upinvis	mIPS_upvis	mIPS_invinvis	mIPS_invvis	mIPS_catch	aIPS_upinvis	aIPS_upvis	aIPS_invinvis	aIPS_invvis	aIPS_catch		ventral_upinvis	ventral_upvis	ventral_invinvis	ventral_invvis	ventral_catch	dorsal_upinvis	dorsal_upvis	dorsal_invinvis	dorsal_invvis	dorsal_catch
1	1.35136	1.28873	1.36385	1.30641	1.12389	0.179509	0.550584	0.159578	0.447933	0.387432	0.312499	0.663914	0.329099	0.563608	0.544104	0.563425	0.815312	0.562775	0.813371	1.32755	0.643745	0.879014	0.641476	0.844425	1.33893	-0.089045	0.099246	-0.037968	0.10303	0.420603		0.27248	0.62981	0.27809	0.5288	0.496963	0.37271	0.59786	0.38876	0.58694	1.02903
2	1.95887	1.88275	2.01538	1.86876	1.8231	0.238457	0.342331	0.177794	0.311715	0.422904	0.566006	0.819087	0.51335	0.724624	0.772795	0.586091	0.490001	0.481146	0.613722	0.985042	0.357787	0.299968	0.244892	0.384084	0.765065	-0.016994	-0.004055	-0.009993	-0.010979	0.207889		0.46849	0.67715	0.41345	0.60169	0.668625	0.30896	0.26197	0.23868	0.32894	0.652665
3	2.42892	2.58076	2.39186	2.57701	2.0202	0.098074	0.707127	0.042009	0.645466	0.229883	0.029192	0.509608	0.048738	0.319609	-0.0473	0.235488	0.321337	0.067393	0.265153	0.465716	1.07182	1.00516	0.973325	1.06021	1.36828	0.089535	0.110419	-0.031789	0.020155	0.726365		0.04522	0.55556	0.04717	0.39542	0.017187	0.54083	0.55268	0.40993	0.53417	0.878873
4	1.68601	1.57579	1.60839	1.61874	1.70456	0.413392	0.679265	0.289301	0.701796	0.479601	0.266183	0.446828	0.257406	0.478441	0.287436	0.325159	0.272225	0.221932	0.267611	0.40618	0.478324	0.481404	0.402301	0.466699	0.869164	0.063256	0.117709	0.069765	0.127798	0.448264		0.29255	0.48846	0.26312	0.51845	0.321857	0.33405	0.32499	0.26365	0.31928	0.59979
5	0.975736	0.84116	0.975704	0.883975	1.4432	0.331672	0.620179	0.238464	0.606245	0.51735	0.10846	0.598309	0.040651	0.429845	0.168087	0.304552	0.237087	0.305652	0.393344	0.754803	0.385223	0.302981	0.24753	0.437032	1.10602	-0.08698	-0.025419	-0.073957	0.026896	0.409809		0.13339	0.60075	0.06275	0.44955	0.207098	0.25851	0.21094	0.20648	0.33753	0.82629
6	1.47732	1.4313	1.47491	1.57306	1.85718	0.387156	0.853638	0.291933	0.936114	0.6923	0.326045	0.671255	0.25252	0.687061	0.420953	0.342842	0.429797	0.420296	0.617687	0.614571	0.456394	0.275586	0.59024	0.604812	1.18271	0.135649	0.20402	0.21421	0.357534	1.16243		0.34194	0.7187	0.26277	0.75184	0.491535	0.31943	0.3348	0.41126	0.54943	0.893572
7	2.31075	2.3182	2.2673	2.31997	1.48672	-0.016967	0.339703	0.010599	0.350544	-0.068477	0.205314	0.893607	0.120355	0.839799	0.189186	0.623046	0.850145	0.572309	0.895107	0.868327	0.711503	0.845807	0.672548	0.852637	1.23564							0.1957	0.86966	0.11561	0.81865	0.178046	0.68202	0.84725	0.63914	0.86679	1.1132
Experimental conditions:
Upright visible ("upvis")
Upright invisible ("upinvis")
Inverted visible ("invvis")
Inverted invisible ("invinvis")
Catch trials, visible dots followed by a button press ("catch")
The ROIs of the same area in the two hemispheres were combined into one ROI, and the percent signal changes (beta values from the GLM) were averaged for all the voxels in that combined ROI.
ROIs:
Early visual cortex: V1
Ventral ROIs: FBA, EBA. Merged ROI: "ventral";
Dorsal ROIs: pIPS, mIPS, aIPS. Merged ROI: "dorsal".
